# Supplementary material
Source: bioRxiv or medRxiv preprint supplement (https://www.medrxiv.org/highwire/filestream/98184/field_highwire_adjunct_files/1/2020.09.24.20200048-2.pdf)
Supplement: Supplementary file [file 2020.09.24.20200048-2.pdf]

## **Covid-19 HGI Contributors**

Andrea Ganna, Andre Franke, Alessandra Renieri, Alexandre Pereira, Patrick Sulem, Kári Stefánsson, Benjamin Neale, Migeotte Isabelle, David van Heel, Aarno Palotie, Mark Daly

## **GenOMICC Contributors**

### **Data analysis**

Erola Pairo-Castineira, Lucija Klaric, Konrad Rawlik, Andrew Bretherick, Alison Meynert, Loukas Moutsianas, Elvina Goutouna, Anne Richmond, Veronique Vitart, James Furniss, Sara Clohisey, Max Head Fourman, Bo Wang, Xia Shen, Nicholas Parkinson, Barbara Shih, Albert Tenesa, Veronique Vitart, James Wilson, J. Kenneth Baillie

### **Edinburgh Clinical Research Facility**

Lee Murphy, Angie Fawkes, Richard Clark, Audrey Coutts, Lorna Donnelly, Tammy Gilchrist, Katarzyna Hafezi, Louise Macgillivray, Alan Maclean, Sarah McCafferty, Kirstie Morrice

### **Data infrastructure**

Trevor Paterson, Fiona Griffith, Tony Wackett, Ruth Armstrong, Jen Meikle, Andy Law

### **GenOMICC Study Central Coordinating Office**

Fiona Griffith, Wilna Oosthuyzen, Jen Meikle, Paul Finernan, James Furniss, Ellie McMaster, Andy Law, Sara Clohisey, J. Kenneth Baillie

### **Sample Collection Coordination**

Jane Weaver, Ceilia Boz, Ailsa Golightly, Mari Ward, Helen Zoor-McElhinney, Adam Brown, Ross Hendry, Andrew Stenhouse, Max Head Fourman, Maaïke Swets, Nicky Day, Filip Taneski, Esther Duncan, Marie Zechner, Nicholas Parkinson, Sara Clohisey

### **GenOMICC co-investigators**

J. Kenneth Baillie, Sara Clohisey, Chris Ponting, Johnny Millar, Julian Knight, Kathy Rowan, David Maslove, Lowell Ling, Alistair Nichol, Charlotte Summers, Tim Walsh, Charles Hinds, Calum Semple, Peter Openshaw, Manu Shankar-Hari, Antonia Ho, Danny McAuley, Hugh Montgomery, Peter Horby.

### **Local Clinical Centre GenOMICC trial staff**

(listed in descending order of the number of patients recruited per site)

### **Barts Health NHS Trust**

D Collier (*PI*), S Wood, A Zak (*Lead Nurses*), J Kassam, C Borra, M Matharu, P May, Z Alldis, O Mitchelmore, R Bowles, A Easthorpe, F Bibi, I Lancoma-Malcolm, J Gurasashvili, J Pheby, J Shiel, M Bolton, M Patel, M Taylor, O Zongo, P Ebano, P Harding, R Astin-Chamberlain, T Newman, Y Choudhury, A Cox, D Kallon, M Burton, R Hall, S Blowes, Z Prime, J Biddle, O Prysyazhna, T Newman, C Tierney, J Kassam, C Borra, M Matharu, P May.

### **Guys and St Thomas' Hospital**

M Shankar-Hari (*PI*), M Ostermann (*Co-PI*), S Campos (*Lead Nurse*), A Bociek, R Lim, N Grau, T O Jones, C Whitton, M Marotti, G Arbane.

### **James Cook University Hospital**

S. Bonner (*PI*), K Hugill, J Reid.

### **The Royal Liverpool University Hospital**

I Welters (*PI*), V Waugh (*Lead Nurse*), K Williams, D Shaw, J Fernandez Roman, M Lopez Martinez, E Johnson, A Waite, B Johnson, O Hamilton, S Mulla.

### **King's College Hospital**

M McPhail (*PI*), J Smith.

### **Royal Infirmary of Edinburgh**

J K Baillie (*PI*), L Barclay (*Lead Nurse*), D Hope, C McCulloch, L McQuillan, S Clark, J Singleton, K Priestley, N Rea, M Callaghan, R Campbell, G Andrew, L Marshall.

### **John Radcliffe Hospital**

S McKechnie (*PI*), P Hutton (*Lead Nurse*), A Bashyal, N Davidson.

### **Addenbrooke's Hospital**

C Summers (*PI*), P Polgarova (*Lead Nurse*), K Stroud, N Pathan, K Elston, S Agrawal.

### **Morrison Hospital**

C Battle (*PI*), L Newey (*Co-PI*), T Rees (*Lead Nurse*), R Harford, E Brinkworth, M Williams, C Murphy.

**Ashford and St Peter's Hospital**

I White (*PI*), M Croft (*Lead Nurse*).

**Royal Stoke University Hospital**

N Bandla (*PI*), M Gellamucho (*Lead Nurse*), J Tomlinson, H Turner, M Davies, A Quinn, I Hussain, C Thompson, H Parker, R Bradley, R Griffiths.

**Queen Elizabeth Hospital, Birmingham**

J. Scriven (*PI*), J Gill.

**Glasgow Royal Infirmary**

A Puxty (*PI*), S Cathcart (*Lead Nurse*), D Salutous, L Turner, K Duffy, K Puxty.

**Kingston Hospital**

A Joseph (*PI*), R Hermangrant (*Lead Nurse*), R Simms, A Swain, A Naranjo, R Crowe, K Sollesta, A Loveridge, D Baptista, E Morino.

**The Tunbridge Wells Hospital**

M Davey (*PI*), D Golden (*Co-PI*), J Jones(*Lead Nurse*).

**North Middlesex University Hospital NHS trust**

J Moreno Cuesta (*PI*), A Haldeos (*Co-PI*), D Bakthavatsalam, R Vincent (*Lead Nurses*), M Elhassan, K Xavier, A Ganesan, D Purohit M Abdelrazik.

**Bradford Royal Infirmary**

J Morgan (*PI*), L Akeroyd (*Lead Nurse*), S Bano, D Warren, M Bromley, K Sellick, L Gurr, B Wilkinson, V Nagarajan, P Szedlak.

**Blackpool Victoria Hospital**

J Cupitt (*PI*), E Stoddard, L Benham (*Lead Nurses*), S Preston, N Slawson, Z Bradshaw, J brown, M Caswell, S Melling.

**Countess of Chester Hospital**

P Bamford (*PI*), M Faulkner, K Cawley, H Jeffrey (*Lead Nurses*), E London, H Sainsbury, I Nagra, F Nasir, Ce Dunmore, R Jones, A Abraheem, M Al-Moasseb, R Girach.

### **Wythenshawe Hospital**

C Brantwood (*PI*), P Alexander (*Co-PI*), J Bradley-Potts (*Lead Nurse*), S Allen, T Felton.

### **St George's Hospital**

S Manna, S Farnell-Ward (*PIs*), S Leaver (*Co-PI*), J Queiroz, E Maccacari (*Lead Nurses*), D Dawson, C Castro Delgado, R Pepermans Saluzzio, O Ezeobu, L Ding, C Sicut, R Kanu, G Durrant, J Texeira, A Harrison, T Samakomva.

### **Good Hope Hospital**

J Scriven (*PI*), H Willis, B Hopkins, L Thrasyvoulou (*Lead Nurses*).

### **Stepping Hill Hospital**

M Jackson (*PI*), A Zaki (*Co-PI*), C Tibke (*Lead Nurse*), S Bennett, W Woodyatt, A Kent, E Goodwin.

### **Manchester Royal Infirmary**

C Brandwood (*PI*), R Clark, L Smith.

### **Royal Alexandra Hospital**

K Rooney (*PI*), N Thomson, N Rodden, E Hughes, D McGlynn, C Clark, P Clark, L Abel (*Lead Nurses*), R Sundaram, L Gemmell, M Brett, J Hornsby, P MacGoe, R Price, B Digby, P O'Neil, P McConnell, P Henderson.

### **Queen Elizabeth University Hospital**

S Henderson (*PI*), M Sim (*Co-PI*), S Kennedy-Hay (*Lead Nurse*), C McParland, L Rooney, N Baxter.

### **Queen Alexandra Hospital**

D Pogson (*PI*), S Rose (*Lead Nurse*), Z Daly, L Brimfield.

### **BHRUT (Barking Havering) - Queens Hospital and King George Hospital**

M K Phull (*PI*), M Hussain (*Co-PI*), T Pogreban, L Rosaroso (*Lead Nurses*), E Salciute L Grauslyte.

### **University College Hospital**

D Brealey (*PI*), E Wraith, N MacCallum (*Co-PIs*), G Bercades (*Lead Nurse*), I Hass, D Smyth, A Reyes, G Martir.

### **Royal Victoria Infirmary, Newcastle Upon Tyne**

I D Clement (*PI*), K Webster (*Lead Nurse*), C Hays, A Gulati.

### **Western Sussex Hospitals**

L Hodgson (*PI*), M Margaron (*Co-PI*), R Gomez, Y Baird (*Lead Nurses*), Y Thirlwall, L Folkes, A Butler, E Meadows, S Moore, D Raynard, H Fox, L Riddles, K King, S Kimber, G Hobden, A McCarthy, V Cannons, I Balagosa, I Chadbourn, A Gardner.

### **Salford Royal Hospital**

D Horner (*PI*), D McLaughlan, B Charles (*Lead Nurses*), N Proudfoot, T Marsden, L Mc Morrow, B Blackledge, J Pendlebury, A Harvey, E Apetri, C Basikolo, L Catlow, R Doonan, K Knowles, S Lee, D Lomas, C Lyons, J Perez, M Poulaka, M Slaughter, K Slevin, M Taylor, V Thomas, D Walker, J Harris.

### **The Royal Oldham Hospital**

A Drummond (*PI*), R Tully (*Co-PI*), J Dearden (*Lead Nurse*), J Philbin, S Munt, C Rishton, G O'Connor, M Mulcahy, E Dobson, J Cuttler, M Edward.

### **Pinderfields General Hospital**

A Rose (*PI*), B Sloan (*Co-PI*), S Buckley (*Lead Nurse*), H Brooke, E Smithson, R Charlesworth, R Sandu, M Thirumaran, V Wagstaff, J Cebrian Suarez.

### **Basildon Hospital**

A Kaliappan (*PI*), M Vertue (*Lead Nurse*), A Nicholson, J Riches, A Solesbury, L Kittridge, M Forsey, G Maloney.

### **University Hospital of Wales**

J Cole (*PI*), M Davies, R Davies, H Hill, E Thomas, A Williams, D Duffin, B Player.

### **Broomfield Hospital**

J Radhakrishnan (*PI*), S Gibson, A Lyle, F McNeela (*Lead Nurses*).

### **Royal Brompton Hospital**

B Patel (*PI*), M Gummadi (*Lead Nurse*), G Sloane, N Dormand, S Salmi, Z Farzad, D Cristiano, K Liyanage, V Thwaites, M Varghese.

### **Nottingham University Hospital**

M Meredith (*PI*).

### **Royal Hallamshire Hospital**

G Mills (*PI*), J Willson (*Lead Nurse*), K Harrington, B Lenagh, K Cawthron S Masuko, A Raithatha, K Bauchmuller, N Ahmad.

### **Royal Hampshire County Hospital**

G Watson (*PI*), J Martin (*Lead Nurse*), E Bevan, C Wrey Brown, D Trodd.

### **Queens Hospital Burton**

K English (*PI*), G Bell, L Wilcox (*Lead Nurses*), A Katary.

### **New Cross Hospital**

S Gopal (*PI*), V Lake and N Harris (*Lead Nurses*), S Metherell, E Radford.

### **Heartlands Hospital**

J Scriven (*PI*), F Moore, H Bancroft, J Daglish, M Sangombe, M Carmody, J Rhodes, M Bellamy.

### **Walsall Manor Hospital**

A Garg (*PI*), A Kuravi (*Co-PI*), E Virgilio, P Ranga, J Butler (*Lead Nurses*), L Botfield, C Dexter, J Fletcher.

### **Stoke Mandeville Hospital**

P Shanmugasundaram (*PI*), G Hambrook (*Lead Nurse*), I Burn, K Manso, D Thornton, J Tebbutt, R Penn.

### **Sandwell General Hospital**

J Hulme (*PI*), S Hussain (*Lead Nurse*), Z Maqsood, S Joseph, J Colley , A Hayes, C Ahmed, R Haque, S Clamp, R Kumar, M Purewal, B Baines.

### **Royal Berkshire NHS Foundation Trust**

M Frise (*PI*), N Jaques, H Coles (*Lead Nurse*), J Caterson, S Gurung Rai, M Brunton, E Tilney, L Keating, A Walden.

### **Charing Cross Hospital**

D Antcliffe (*PI*), M Templeton (*Lead Nurse*), R Rojo, D Banach, S Sousa Arias, Z Fernandez, P Coghlan.

**St Mary's Hospital**

D Antcliffe (*PI*), A Gordon (*Co-PI*), M Templeton (*Lead Nurse*), R Rojo, D Banach, S Sousa Arias, Z Fernandez, P Coghlan.

**Hammersmith Hospital**

D Antcliffe (*PI*), A Gordon (*Co-PI*), M Templeton (*Lead Nurses*), R Rojo, D Banach, S Sousa Arias, Z Fernandez, P Coghlan.

**Dumfries and Galloway Royal Infirmary**

D Williams (*PI*), C Jardine (*Lead Nurse*).

**Bristol Royal Infirmary**

J Bewley (*PI*), K Sweet (*Lead Nurse*), L Grimmer, R Johnson, Z Garland, B Gumbrill.

**Royal Sussex County Hospital, Brighton**

C Phillips (*PI*), L Ortiz-Ruiz de Gordoia (*Co-PI*), E Peasgood.

**Whiston Hospital**

A Tridente (*PI*), K Shuker (*Lead Nurse*) S Greer.

**Royal Glamorgan Hospital**

C Lynch (*PI*), C Potheary, L Roche B Deacon (*Lead Nurses*), K Turner, J Singh, G Sera Howe.

**King's Mill Hospital**

P Paul (*PI*), M Gill (*Lead Nurse*), I Wynter, V Ratnam, S Shelton.

**Fairfield General Hospital**

J Naisbitt (*PI*), J Melville.

**Western General Hospital**

J K Baillie (*PI*), S Morrison (*Lead Nurse*).

**Northwick Park Hospital**

A McGregor (*PI*), V Parris (*Co-PI*), M Mpelebue (*Lead Nurse*), S Srikanan, C Dennis, A Sukha.

**Royal Preston Hospital**

A Williams (*PI*), M Verlande.

**Royal Derby Hospital**

K Holding (*PI*), K Riches (*Lead Nurse*), C Downes, C Swan.

**Sunderland Royal Hospital**

A Rostron (*PI*), A Roy (*Co-PI*), L Woods (*Lead Nurse*), S Cornell, F Wakinshaw.

**Royal Surrey County Hospital**

B Creagh-Brown (*PI*), H Blackman, A Salberg (*Lead Nurses*), E Smith, S Donlon, S Mtuwa, N Michalak-Glinska, S Stone, C Beazley, V Pristopan.

**Derriford Hospital**

N Nikitas (*PI*), L Lankester (*Lead Nurse*), C Wells.

**Croydon University Hospital**

A S Raj (*PI*), K Fletcher (*Co-PI*), R Khade (*Lead Nurse*), G Tsinaslanidis.

**Victoria Hospital**

M McMahon (*PI*), S Fowler, A McGregor (*Lead Nurses*), T Coventry.

**Milton Keynes University Hospital**

R Stewart (*PI*), L Wren, E Mwaura, L Mew, A Rose (*Lead Nurses*), D Scaletta, F Williams.

**Barnsley Hospital**

K Inweregbu (*PI*), A Nicholson (*Lead Nurse*), N Lancaster, M Cunningham, A Daniels, L Harrison, S Hope, S Jones, A Crew, G Wray, J Matthews, R Crawley.

**York Hospital**

J Carter (*PI*), I Birkinshaw (*Lead Nurse*), J Ingham, Z Scott, K Howard, R Joy, S Roche.

**University Hospital of North Tees**

M Clark (*PI*), S Purvis (*Lead Nurse*).



### **University Hospital Wishaw**

A Morrison (*PI*), D Strachan (*Co-PI*), M Taylor (*Lead Nurse*), S Clements, K Black.

### **Whittington Hospital**

C Parmar (*PI*), A Altabaibeh (*Co-PI*), K Simpson, L Mostoles (*Lead Nurses*), K Gilbert, L Ma, A Alvaro.

### **Southmead Hospital**

M Thomas (*PI*), B Faulkner (*Lead Nurse*), R Worner, K Hayes, E Gendall, H Blakemore, B Borislavova, E Goff.

### **The Royal Papworth Hospital**

A Vuylsteke (*PI*), L Mwaura (*Co-PI*), J Zamikula (*Lead Nurse*), L Garner, A Mitchell, S Mephram, L Cagova, A Fofano, H Holcombe, K Praman.

### **Royal Gwent Hospital**

T Szakmany (*PI*), A E Heron, S Cherian (*Lead Nurses*), S Cutler, A Roynon-Reed.

### **Norfolk and Norwich University hospital (NNUH)**

G Randell (*PI*), K Convery (*Lead Nurse*), K Stammers D Fottrell-Gould, L Hudig, J Keshet-price.

### **Great Ormond St Hospital and UCL Great Ormond St Institute of Child Health NIHR Biomedical Research Centre**

M Peters (*PI*), L O'Neill (*Lead Nurse*), S Ray, H Belfield, T McHugh, G Jones, O Akinkugbe, A Tomas, E Abaleke, E Beech, H Meghari, S Yussuf, A Bamford.

### **Airedale General Hospital**

B Hairsine (*PI*), E Dooks, F Farquhar, S Packham, H Bates (*Lead Nurses*), C McParland, L Armstrong.

### **Aberdeen Royal Infirmary**

C Kaye (*PI*), A Allan (*Lead Nurse*), J Medhora, J Liew, A Botello, F Anderson.

### **Northern General Hospital**

G Mills (*PI*), J Willson (*Lead Nurse*), J Barker, Y Jackson, F Kibutu, S Bird, A Raithatha, Dr K Bauchmuller, N Ahmad.

### **Southampton General Hospital**

R Cusack (*PI*), H Golding (*Lead Nurse*), K Prager, T Williams, S Leggett, K Golder, M Male, O Jones, K Criste, M Marani.

### **Russell's Hall Hospital**

Dr. Anumakonda (*PI*), V Amin, K Karthik, R Kausar (*Co-PIs*), E Anastasescu, K Reid (*Lead Nurses*), Ms. Jacqui.

### **Rotherham General Hospital**

A Hormis (*PI*), R Walker (*Lead Nurse*), D Collier.

### **North Manchester General Hospital**

T Duncan (*PI*), A Uriel, A Ustianowski (*Co-PIs*), H T-Michael (*Lead Nurses*), M Bruce, K Connolly, K Smith.

### **Basingstoke and North Hampshire Hospital**

R Partridge (*PI*), D Griffin, M McDonald, N Muchenje.

### **Royal Free Hospital**

D Martin (*PI*), H Filipe (*Lead Nurse*), C Eastgate, C Jackson.

### **Hull Royal Infirmary**

A Gratrix (*PI*), L Foster, V Martinson, E Stones, Caroline Abernathy, P Parkinson.

### **Harefield Hospital**

A Reed (*PI*), C Prendergast (*Lead Nurse*), P Rogers, M Woodruff, R Shokkar, S Kaul, A Barron, C Collins.

### **Chesterfield Royal Hospital Foundation Trust**

S Beavis(*PI*), A Whileman (*Lead Nurse*), K Dale, J Hawes, K Pritchard, R Gascoyne, L Stevenson.

### **Barnet Hospital**

R Jha (*PI*), L Lim (*Lead Nurse*), V Krishnamurthy.

### **Aintree University Hospital**

R Parker (*PI*), I Turner-Bone (*Lead Nurse*), L Wilding, A Reddy.

**St James's University Hospital**

S Whiteley (*PI*), E Wilby (*Lead Nurse*), C Howcroft, A Aspinwall, S Charlton, B Ogg.

**Maidstone Hospital**

D Golden (*PI*), M Davey (*Co-PI*), J Jones (*Lead Nurse*).

**Glan Clwyd Hospital**

D Menzies (*PI*), R Pugh (*Co-PI*), E Allan (*Lead Nurse*), R Lean, F Davies, J Easton, X Qiu, S Kumar, K Darlington.

**University Hospital Crosshouse**

G Houston (*PI*), P O'Brien, T Geary, J Allan, A Meikle.

**Royal Bolton Hospital**

G Hughes (*PI*), M Balasubramaniam (*Co-PI*), S Latham, E McKenna (*Lead Nurses*), R Flanagan.

**Princess of Wales Hospital**

S Sathe (*PI*), E Davies L Roche (*Lead Nurses*).

**Pilgrim Hospital**

M Chablani (*PI*), A Kirkby, K Netherton, S Archer (*Lead Nurses*).

**Northumbria Healthcare NHS Foundation Trust**

B Yates (*PI*), C Ashbrook-Raby.

**Ninewells Hospital**

S Cole (*PI*), M Casey (*Co-PI*), L Cabrelli (*Lead Nurse*), S Chapman, M Casey, P Austin, A Hutcheon, C Whyte, C Almaden- Boyle.

**Lister hospital**

N Pattison (*PI*), C Cruz (*Lead Nurse*).

**Bedford Hospital**

A Vochin (*PI*), H Kent, A Thomas, S Murdoch (*Co-PI*), B David (*Lead Nurse*), M Penacerrada, G Lubimbi, V Bastion, R Wulandari, J Valentine, D Clarke.

**Royal United Hospital Bath**

A Serrano-Ruiz (*PI*), S Hierons (*Lead Nurse*), L Ramos, C Demetriou, S Mitchard, K White.

**Royal Bournemouth Hospital**

N White (*PI*), S Pitts, D Branney (*Lead Nurses*), J Frankham.

**The Great Western Hospital**

M Watters (*PI*), H Langton (*Lead Nurse*), R Prout.

**Watford General Hospital**

V Page (*PI*), T Varghes.

**University Hospital North Durham**

A Cowton (*PI*), A Kay (*Lead Nurse*), K Potts, M Birt, M Kent, A Wilkinson.

**Tameside General Hospital**

E Jude (*PI*), V Turner (*Lead Nurse*), H Savill, J McCormick, M Clark, M Coulding, S Siddiqui, O Mercer, H Rehman, D Potla.

**Princess Royal Hospital Shrewsbury**

N Capps (*PI*), D Donaldson (*Lead Nurse*), J Jones, H Button, T Martin, K Hard, A Agasou, L Tonks, T Arden, P Boyle, M Carnahan, J Strickley, C Adams, D Childs, R Rikunenko, M Leigh, M Breekes, R Wilcox, A Bowes, H Tiveran, F Hurford, J Summers, A Carter, Y Hussain, L Ting, A Javaid, N Motherwell, H Moore, H Millward, S Jose.

**Arrowe Park Hospital**

G Sadera (*PI*), R Jacob, C Jones (*Lead Nurses*).

**The Queen Elizabeth Hospital King's Lynn**

M Blunt (*PI*), Z Coton (*Lead Nurse*), H Curgenvén', S Mohamed Ally, K Beaumont, M Elsaadany, K Fernandes, I Ali Mohamed Ali, H Rangarajan, V Sarathy, S Selvanayagam, D Vedage, M White.

**Royal Blackburn Teaching Hospital**

M Smith (*PI*), N Truman, S Chukkambotla (*Co-PIs*), S Keith, J Cockerill-Taylor (*Lead Nurses*), J Ryan-Smith, R Bolton, P Springle, J Dykes, J Thomas, M Khan, M T Hijazi, E Massey, G Croston.

**Poole Hospital**

H Reschreiter (*PI*), J Camsooksai (*Lead Nurse*), S Patch, S Jenkins, C Humphrey, B Wadams, J Camsooksai.

**Medway Maritime Hospital**

N Bhatia (*PI*), M Msiska (*Lead Nurse*), O Adanini.

**Warwick Hospital**

B Attwood (*PI*), P Parsons (*Lead Nurse*).

**The Royal Marsden Hospital**

K Tatham (*PI*), S Jhanji (*Co-PI*), E Black (*Lead Nurse*), A Dela Rosa, R Howle, B Thomas, T Bemand, R Raobaikady.

**The Princess Alexandra Hospital**

R Saha (*PI*), N Staines (*Lead Nurse*), A Daniel, J Finn.

**Royal Shrewsbury Hospital**

N Capps (*PI*), D Donaldson (*Co-PI*), M Carnahan, D Donaldson (*Lead Nurses*), J Stickley, J Jones, H Button, S Jose, P Boyle, N Schunki, A Noakes, C Clulow, K Hard, C Adams, R Wilcox.

**Musgrove Park Hospital**

J Hutter (*PI*), P Doble (*Lead Nurse*), C Shovelton, C Pawley.

**George Eliot Hospital NHS Trust**

T Kannan (*PI*), M Hill.

**East Surrey Hospital**

E Combes (*PI*), S Monnery (*Co-PI*), T Joefield.

**West Middlesex Hospital**

M Popescu (*PI*), M Thankachen, M Oblak (*Lead Nurses*).

**Warrington General Hospital**

J Little (*PI*), S McIvor, A Brady (*Co-PI*), H Whittle, H Prady, R Chan (*Lead Nurses*).

**Southport and Formby District General Hospital**

A Ahmed (*PI*), A Morris.

**Royal Devon and Exeter Hospital**

C Gibson (*PI*), E Gordon, S Keenan, H Quinn (*Lead Nurses*), S Benyon, S Marriott, L Zitter, L Park, K Baines.

**Macclesfield District General Hospital**

M Lyons (*PI*), M Holland, N Keenan (*Lead Nurses*), M Young.

**Borders General Hospital**

S Garrloch (*PI*), J Dawson (*Lead Nurse*), M Tolson.

**Birmingham Children's Hospital**

B Scholefield (*PI*), R Bi.

**William Harvey Hospital**

N Richardson (*PI*), N Schumacher (*Co-PI*), T Cosier, G Millen (*Lead Nurses*).

**Royal Lancaster Infirmary**

A Higham (*PI*), K Simpson (*Lead Nurse*).

**Queen Elizabeth the Queen Mother Hospital**

S Turki(*PI*), L Allen, Nikki Crisp (*Lead Nurses*), T Hazleton, A Knight, J Deery, C Price, S Turney, S Tilbey, E Beranova.

**Liverpool Heart and Chest Hospital**

D Wright (*PI*), L Georg (*Lead Nurse*), S Twiss.

**Darlington Memorial Hospital**

A Cowton (*PI*), S Wadd (*Lead Nurse*), K Postlethwaite.

**Southend University Hospital**

P Gondo (*PI*), B Masunda (*Lead Nurse*), A Kayani, B Hadebe.

**Raigmore Hospital**

J Whiteside (*PI*), R Campbell (*Lead Nurse*), N Clarke.

**Salisbury District Hospital**

P Donnison (*PI*), F Trim, I Leadbitter.

**Peterborough City Hospital**

D Butcher (*PI*), S O'Sullivan (*Lead Nurse*).

**Ipswich Hospital**

B Purewal (*PI*), B Purewal (*Lead Nurse*), S Bell, V Rivers'.

**Hereford County Hospital**

R O'Leary(*PI*), J Birch, E Collins, S Anderson (*Lead Nurses*), K Hammerton, E Andrews.

**Furness General Hospital**

A Higham (*PI*) K Burns (*Lead Nurse*).

**Forth Valley Royal Hospital**

I Edmond (*PI*), D Salutous (*Lead Nurse*), A Todd, J Donnachie, P Turner, L Prentice, L Symon, N Runciman, F Auld.

**Torbay Hospital**

M Halkes (*PI*), P Mercer (*Lead Nurse*), L Thornton.

**St Mary's Hospital**

G Debreceni (*PI*), J Wilkins, A Brown, V Crickmore.

**Royal Manchester Children's Hospital**

G Subramanian (*PI*), R Marshall, C Jennings (*Lead Nurses*), M Latif, L Bunni.

**Royal Cornwall Hospital**

M Spivey (*PI*), S Bean, K Burt (*Lead Nurses*).

**Queen Elizabeth Hospital Gateshead**

V Linnett(*PI*), J Ritzema, A Sanderson (*Lead Nurses*), W McCormick, M Bokhari.

**Kent & Canterbury Hospital**

R Kapoor (*PI*), D Loader (*Lead Nurse*).

**James Paget University Hospital NHS Trust**

A Ayers (*PI*), W Harrison (*Lead Nurse*), J North.

**Darent Valley Hospital**

Z Belagodu (*PI*), R Parasomthy (*Co-PI*), O Olufuwa (*Lead Nurse*), A Gherman, B Fuller, C Stuart.

**The Alexandra Hospital, Redditch**

O Kelsall (*PI*), C Davis (*Co-PI*), L Wild (*Lead Nurse*), H Wood, J Thrush, A Durie, K Austin', K Archer, P Anderson, C Vigurs.

**Ysbyty Gwynedd**

C Thorpe (*PI*), A Thomas (*Lead Nurse*), E Knights, N Boyle, A Price.

**Yeovil Hospital**

A Kubisz-Pudelko (*PI*), D Wood (*Lead Nurse*), A Lewis, S Board, L Pippard, J Perry, K Beesley.

**University Hospital Hairmyres**

A Rattray(*PI*), M Taylor (*Lead Nurse*), E Lee, L Lennon, K Douglas, D Bell, R Boyle, L Glass, A Rattray'

**Scunthorpe General Hospital**

M Nauman Akhtar (*PI*), K Dent (*Lead Nurse*), D Potoczna, S Pearson, E Horsley, S Spencer.

**Princess Royal Hospital Brighton**

C Phillips (*PI*), D Mullan (*Lead Nurse*), D Skinner, J Gaylard, L Ortiz-Ruizdegordoa.

**Lincoln County Hospital**

R Barber (*PI*), C Hewitt (*Lead Nurse*), A Hilldrith, S Shepardson, M Wills, K Jackson-Lawrence.

**Homerton University Hospital**

A Gupta (*PI*), A Easthope (*Co-PI*), E Timlick (*Lead Nurse*), C Gorman.



**Glangwili General Hospital**

I Otaha (*PI*), A Gales (*Co-PI*), S Coetzee (*Lead Nurse*), M Raj, M Peiu.

**Ealing Hospital**

V Parris (*PI*), S Quaid (*Lead Nurse*), E Watson.

**Scarborough General Hospital**

K Elliott (*PI*), J Mallinson (*Co-PI*), B Chandler, A Turnbull.

**Royal Albert Edward Infirmary**

A Quinn (*PI*), C Finch, C Holl, J Cooper, A Evans.

**Queen Elizabeth Hospital, Woolwich.**

W Khaliq (*PI*), A Collins(*Lead Nurse*), E Treus Gude.

**North Devon District Hospital**

N Love (*PI*), L van Koutrik, J Hunt (*Lead Nurse*), D Kaye, E Fisher, A Brayne, V Tuckey, P Jackson, J Parkin.

**National Hospital for Neurology and Neurosurgery**

D Brealey (*PI*), E Raith (*Co-PI*), A Tariq (*Lead Nurse*), H Houlden, A Tucci, J Hardy', E Moncur.

**Leeds General Infirmary**

S Whiteley (*PI*), E Wilby (*Lead Nurse*), C Howcroft, A Aspinwall, S Charlton, B Ogg.

**Eastbourne District General Hospital**

J Highgate(*PI*), A Cowley (*Lead Nurse*).

**Diana Princess of Wales Hospital**

A Mitra (*PI*), R Stead (*Lead Nurse*), T Behan, C Burnett, M Newton, E Heeney, R Pollard, J Hatton.

**The Christie NHS Foundation Trust**

A Patel (*PI*), V Kasipandian (*Co-PI*), S Allibone (*Lead Nurse*), R M Genetu.

**Prince Philip Hospital**

I Otahal (*PI*), L O'Brien (*Lead Nurse*), Z Omar, E Perkins, K Davies.

**Prince Charles Hospital**

D Tetla (*PI*), C Potheary, B Deacon (*Lead Nurses*).

**Golden Jubilee National Hospital**

B Shelley (*PI*), V Irvine (*Lead Nurse*).

**Dorset County Hospital**

S Williams (*PI*), P Williams (*Lead Nurse*), J Birch, J Goodsell, R Tutton, L Bough, B Winter-Goodwin.

**Calderdale Royal Hospital**

R Kitson (*PI*), J Pinnell (*Co-PI*), A Wilson (*Lead Nurse*), T Nortcliffe, T Wood, M Home, K Holdroyd, M Robinson, KHanson, R Shaw, J Greig, M Brady, A Haigh, L Matupe, M Usher, S Mellor, S Dale, L Gledhill, L Shaw, G Turner, D Kelly, B Anwar, H Riley, H Sturgeon, A Ali, L Thomis, D Melia, A Dance, K Hanson,

**West Suffolk Hospital**

S Humphreys (*PI*), I Frost, V Gopal, J Godden, A Holden, S Swann.

**West Cumberland Hospital**

T Smith (*PI*), M Clapham (*Lead Nurse*), U Poultney, R Harper, P Rice.

**University Hospital Lewisham**

W Khaliq (*PI*), R Reece-Anthony (*Lead Nurse*), B Gurung.

**St John's Hospital**

S Moultrie (*PI*), M Odam.

**Sheffield children's hospital**

A Mayer (*PI*), A Bellini (*Lead Nurse*), A Pickard, J Bryant, N Roe, J Sowter.

**Hinchingbrooke**

D Butcher (*PI*), K Lang, J Taylor (*Lead Nurses*).

### **Glenfield Hospital**

P Barry (*PI*).

### **Bronglais General Hospital**

M Hobrok (*PI*), H Tench (*Lead Nurse*), R Wolf-Roberts, H McGuinness, R Loosley.

### **Alder Hey**

D Hawcutt (*PI*), L Rad, L O'Malley, (*Lead Nurse*), P Saunderson, G Seddon, T Anderson, N Rogers.

### **University Hospital Monklands**

J Ruddy (*PI*), Margaret H, M Taylor (*Lead Nurses*), C Beith, A McAlpine, L Ferguson, P Grant, S MacFadyen, M McLaughlin, T Baird, S Rundell, L Glass, B Welsh, R Hamill, F Fisher.

### **Worcester Royal Hospital**

O Kelsall (*PI*), C Davis (*Co-PI*), L Wild (*Lead Nurse*), H Wood, J Thrush, A Durie, K Austin', K Archer, P Anderson, C Vigurs.

### **Conquest Hospital**

J Highgate (*PI*), A Cowley(*Lead Nurse*).

### **Cumberland Infirmary**

T Smith (*PI*), J Gregory (*Lead Nurse*), A Brown.

## **ISARIC4C Investigators**

*Consortium Lead Investigator*: J Kenneth Baillie, *Chief Investigator*: Malcolm G Semple, *Co-Lead Investigator*: Peter JM Openshaw. *ISARIC Clinical Coordinator*: Gail Carson.

*Co-Investigators*: Beatrice Alex, Benjamin Bach, Wendy S Barclay, Debby Bogaert, Meera Chand, Graham S Cooke, Annemarie B Docherty, Jake Dunning, Ana da Silva Filipe, Tom Fletcher, Christopher A Green, Ewen M Harrison, Julian A Hiscox, Antonia Ying Wai Ho, Peter W Horby, Samreen Ijaz, Saye Khoo, Paul Klenerman, Andrew Law, Wei Shen Lim, Alexander J Mentzer, Laura Merson, Alison M Meynert, Mahdad Noursadeghi, Shona C Moore, Massimo Palmarini, William A Paxton, Georgios Pollakis, Nicholas Price, Andrew Rambaut, David L Robertson, Clark D Russell, Vanessa Sancho-Shimizu, Janet T Scott, Thushan de Silva, Louise Sigfrid, Tom Solomon, Shiranee Sriskandan, David Stuart, Charlotte

Summers, Richard S Tedder, Emma C Thomson, AA Roger Thompson, Ryan S Thwaites, Lance CW Turtle, Maria Zambon.

*Project Managers:* Hayley Hardwick, Chloe Donohue, Ruth Lyons, Fiona Griffiths, Wilna Oosthuyzen.

*Data Analysts:* Lisa Norman, Riinu Pius, Tom M Drake, Cameron J Fairfield, Stephen Knight, Kenneth A Mclean, Derek Murphy, Catherine A Shaw.

*Data and Information System Manager:* Jo Dalton, Michelle Girvan, Egle Saviciute, Stephanie Roberts, Janet Harrison, Laura Marsh, Marie Connor, Sophie Halpin, Clare Jackson, Carrol Gamble.

*Data integration and presentation:* Gary Leeming, Andrew Law, Murray Wham, Sara Clohisey, Ross Hendry, James Scott-Brown.

*Material Management:* William Greenhalf, Victoria Shaw, Sarah McDonald.

*Patient engagement:* Seán Keating

*Outbreak Laboratory Volunteers:* Katie A. Ahmed, Jane A Armstrong, Milton Ashworth, Innocent G Asiiimwe, Siddharth Bakshi, Samantha L Barlow, Laura Booth, Benjamin Brennan, Katie Bullock, Benjamin WA Catterall, Jordan J Clark, Emily A Clarke, Sarah Cole, Louise Cooper, Helen Cox, Christopher Davis, Oslem Dincarslan, Chris Dunn, Philip Dyer, Angela Elliott, Anthony Evans, Lewis WS Fisher, Terry Foster, Isabel Garcia-Dorival, William Greenhalf, Philip Gunning, Catherine Hartley, Antonia Ho, Rebecca L Jensen, Christopher B Jones, Trevor R Jones, Shadia Khandaker, Katharine King, Robyn T. Kiy, Chrysa Koukorava, Annette Lake, Suzannah Lant, Diane Latawiec, L Lavelle-Langham, Daniella Lefteri, Lauren Lett, Lucia A Livoti, Maria Mancini, Sarah McDonald, Laurence McEvoy, John McLauchlan, Soeren Metelmann, Nahida S Miah, Joanna Middleton, Joyce Mitchell, Shona C Moore, Ellen G Murphy, Rebekah Penrice-Randal, Jack Pilgrim, Tessa Prince, Will Reynolds, P. Matthew Ridley, Debby Sales, Victoria E Shaw, Rebecca K Shears, Benjamin Small, Krishanthi S Subramaniam, Agnieska Szemiel, Aislynn Taggart, Jolanta Tanianis-Hughes, Jordan Thomas, Erwan Trochu, Libby van Tonder, Eve Wilcock, J. Eunice Zhang.

*Local Principal Investigators:* Kayode Adeniji, Daniel Agranoff, Ken Agwuh, Dhiraj Ail, Ana Alegria, Brian Angus, Abdul Ashish, Dougal Atkinson, Shahedal Bari, Gavin Barlow, Stella Barnass, Nicholas Barrett, Christopher Bassford, David Baxter, Michael Beadsworth, Jolanta Bernatoniene, John Berridge, Nicola Best, Pieter Bothma, David Brealey, Robin Brittain-Long, Naomi Bulteel, Tom Burden, Andrew Burtenshaw, Vikki Caruth, David Chadwick, Duncan Chamber, Nigel Chee, Jenny Child, Srikanth Chukkambotla, Tom Clark, Paul Collini, Catherine Cosgrove, Jason Cupitt, Maria-Teresa Cutino-Moguel, Paul Dark, Chris Dawson, Samir Dervisevic, Phil Donnison, Sam Douthwaite, Ingrid Durand, Ahilanadan Dushianthan, Tristan Dyer, Cariad Evans, Chi Eziefula, Christopher Fegan, Adam Finn, Duncan Fullerton, Sanjeev Garg, Sanjeev Garg,

Atul Garg, Effrossyni Gkrania-Klotsas, Jo Godden, Arthur Goldsmith, Clive Graham, Elaine Hardy, Stuart Hartshorn, Daniel Harvey, Peter Havalda, Daniel B Hawcutt, Maria Hobrok, Luke Hodgson, Anita Holme, Anil Hormis, Michael Jacobs, Susan Jain, Paul Jennings, Agilan Kaliappan, Vidya Kasipandian, Stephen Kegg, Michael Kelsey, Jason Kendall, Caroline Kerrison, Ian Kerslake, Oliver Koch, Gouri Koduri, George Koshy, Shondipon Laha, Steven Laird, Susan Larkin, Tamas Leiner, Patrick Lillie, James Limb, Vanessa Linnett, Jeff Little, Michael MacMahon, Emily MacNaughton, Ravish Mankregod, Huw Masson, Elijah Matovu, Katherine McCullough, Ruth McEwen, Manjula Meda, Gary Mills, Jane Minton, Mariyam Mirfenderesky, Kavya Mohandas, Quen Mok, James Moon, Elinoor Moore, Patrick Morgan, Craig Morris, Katherine Mortimore, Samuel Moses, Mbiye Mpenge, Rohinton Mulla, Michael Murphy, Megan Nagel, Thapas Nagarajan, Mark Nelson, Igor Otahal, Mark Pais, Selva Panchatsharam, Hassan Paraiso, Brij Patel, Justin Pepperell, Mark Peters, Mandeep Phull, Stefania Pintus, Jagtur Singh Pooni, Frank Post, David Price, Rachel Prout, Nikolas Rae, Henrik Reschreiter, Tim Reynolds, Neil Richardson, Mark Roberts, Devender Roberts, Alistair Rose, Guy Rousseau, Brendan Ryan, Taranprit Saluja, Aarti Shah, Prad Shanmuga, Anil Sharma, Anna Shawcross, Jeremy Sizer, Manu Shankar-Hari, Richard Smith, Catherine Snelson, Nick Spittle, Nikki Staines, Tom Stambach, Richard Stewart, Pradeep Subudhi, Tamas Szakmany, Kate Tatham, Jo Thomas, Chris Thompson, Robert Thompson, Ascanio Tridente, Darell Tupper-Carey, Mary Twagira, Andrew Ustianowski, Nick Vallotton, Lisa Vincent-Smith, Shico Visuvanathan, Alan Vuylsteke, Sam Waddy, Rachel Wake, Andrew Walden, Ingeborg Welters, Tony Whitehouse, Paul Whittaker, Ashley Whittington, Meme Wijesinghe, Martin Williams, Lawrence Wilson, Sarah Wilson, Stephen Winchester, Martin Wiselka, Adam Wolverson, Daniel G Wooton, Andrew Workman, Bryan Yates, and Peter Young.

This work uses data provided by patients and collected by the NHS as part of their care and support #DataSavesLives. We are extremely grateful to the 2,648 frontline NHS clinical and research staff and volunteer medical students, who collected this data in challenging circumstances; and the generosity of the participants and their families for their individual contributions in these difficult times. We also acknowledge the support of Jeremy J Farrar, Nahoko Shindo, Devika Dixit, Nipunie Rajapakse, Lyndsey Castle, Martha Buckley, Debbie Malden, Katherine Newell, Kwame O'Neill, Emmanuelle Denis, Claire Petersen, Scott Mullaney, Sue MacFarlane, Nicole Maziere, Julien Martinez, Oslem Dincarslan, and Annette Lake.
